# Supplementary material for: Ratio fluorescence detection of tetracycline by a Eu3+/NH2-MIL-53(Al) composite
Source: Royal Society of Chemistry journal article supplement (doi:10.1039/d0ra09185e), 2021-01-01
Supplement: d0ra09185e1.pdf [file d0ra09185e1.pdf]

## **Ratio Fluorescence Detection of Tetracycline by $\text{Eu}^{3+}/\text{NH}_2\text{-MIL-53(Al)}$ composite**

Jing Chen\*, Yali Xu, Shuying Li, Fanghong Xu, Qian Zhang

Key Lab of Bioelectrochemistry & Environmental Analysis of Gansu, College of  
Chemistry and Chemical Engineering, Northwest Normal University, Lanzhou  
730070, China

Corresponding address:

Key Lab of Bioelectrochemistry & Environmental Analysis of Gansu,

College of Chemistry and Chemical Engineering,

Northwest Normal University,

Lanzhou, 730070, P. R. China

Tel: +86-931-7971275

E-mail: [jchen@nwnu.edu.cn](mailto:jchen@nwnu.edu.cn)

---

\* Corresponding author.

Table 1 Comparison of This Method with Reported Tetracycline Sensors.

| Methods     | Materials                                     | Linear range                   | LOD                               | Ref       |
|-------------|-----------------------------------------------|--------------------------------|-----------------------------------|-----------|
| LC-MS/MS    | -                                             | 25-200 $\mu\text{g}/\text{kg}$ | 2.22-3.59 $\mu\text{g}/\text{kg}$ | 1         |
| CE          | -                                             | 25-250 $\mu\text{g}/\text{L}$  | 2-9 $\mu\text{g}/\text{L}$        | 2         |
| Fluorometry | FeOx@SiO <sub>2</sub> -FMIPs                  | 0.2-6 $\mu\text{M}$            | 117 nM                            | 3         |
| Fluorometry | CDs                                           | 2-150 $\mu\text{M}$            | 520 nM                            | 4         |
| Fluorometry | Eu-EDTA+surfactant                            | 0.2-5 $\mu\text{M}$            | 0.2 $\mu\text{M}$                 | 5         |
| Fluorometry | NH <sub>2</sub> -MIL-53(Al)                   | 1.5-70 $\mu\text{M}$           | 0.92 $\mu\text{M}$                | This work |
| Fluorometry | Eu <sup>3+</sup> /NH <sub>2</sub> -MIL-53(Al) | 0.5-60 $\mu\text{M}$           | 0.16 $\mu\text{M}$                | This work |

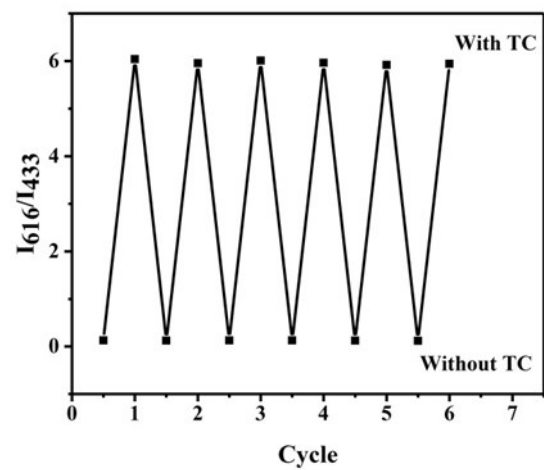

Fig. S1 The fluorescence reversibility of the probe in aqueous solution

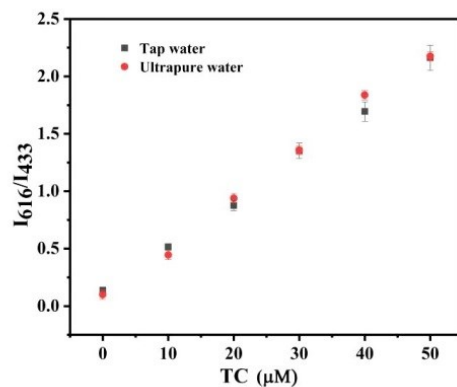

Fig. S2 The linear relationship between the TC concentration of different concentrations in the actual water sample and the ratio of the fluorescence intensity of the probe

Table 2 The Results for the Determination of TC in Real Samples.

| Sample    | Added (μM) | Founded (μM) | Recovery (n=3,%) | RSD (n=3,%) |
|-----------|------------|--------------|------------------|-------------|
| Tap water | 20         | 20.6526      | 103.26           | 5.9966      |
|           | 30         | 30.4321      | 101.44           | 1.5346      |
|           | 40         | 38.0127      | 95.03            | 2.4287      |

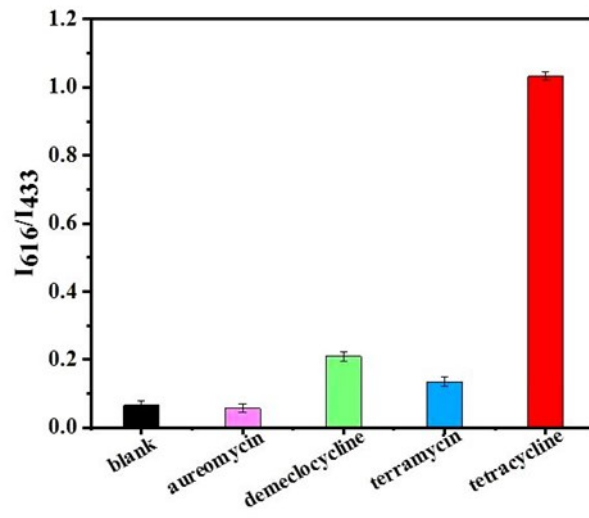

Fig. S3 Selectivity of fluorescent probes to aureomycin, terramycin, tetracycline, demeclocycline at room temperature

- [1] S. O. S. Mookantsa, S. Dube, M. M. Nindi, Development and application of a dispersive liquid-liquid microextraction method for the determination of tetracyclines in beef by liquid chromatography mass spectrometry. *Talanta* 148 (2016) 321-328.
- [2] Rodríguez Ávila, José Antonio. Magnetic solid phase extraction based on phenyl silica adsorbent for the determination of tetracyclines in milk samples by capillary electrophoresis. *J. Chromatogr. A* 1218 (2011) 2196-2202.
- [3] J. Ashley, X. T. Feng, Y. A. Sun, multifunctional molecularly imprinted polymer-based biosensor for direct detection of doxycycline in food samples. *Talanta* 182 (2018) 49-54.
- [4] M. Lin,; H. Y. Zou,; T. Yang, et al. An inner filter effect based sensor of tetracycline hydrochloride as developed by loading photoluminescent carbon nanodots in the electrospun nanofibers. *Nanoscale* 8 (2016) 2999-3007.
- [5] J. Zhang, B. Zhang, Y. Wu, et al. Fast determination of the tetracyclines in milk samples by the aptamer biosensor. *Analyst* 135(10) (2010) 2706-2710.
